# Supplementary material for: Screening and Identification of the Metabolites in Rat Plasma and Urine after Oral Administration of Areca catechu L. Nut Extract by Ultra-High-Pressure Liquid Chromatography Coupled with Linear Ion Trap–Orbitrap Tandem Mass Spectrometry
Source: PubMed Central journal article supplement (PMC6152711; doi:10.3390/molecules22061026), 2017-06-21
Supplement: molecules-22-01026-s001.pdf [file molecules-22-01026-s001.pdf]

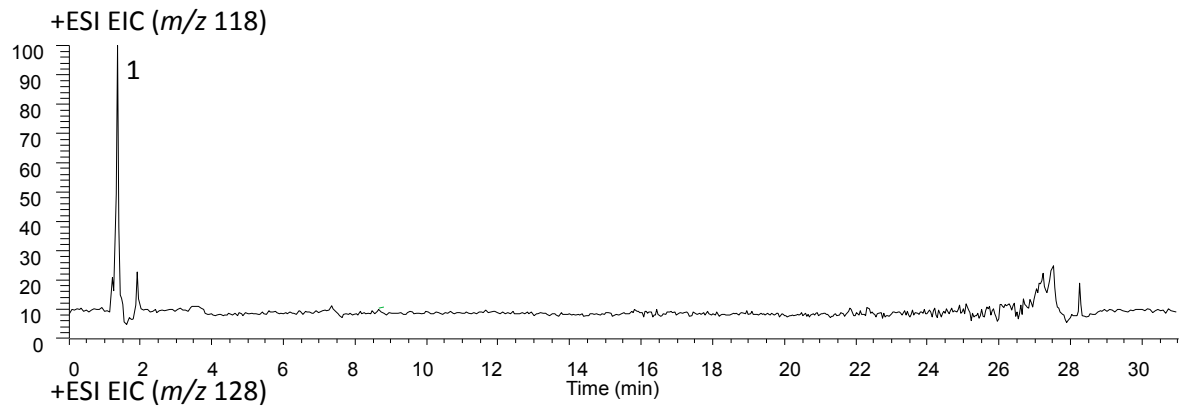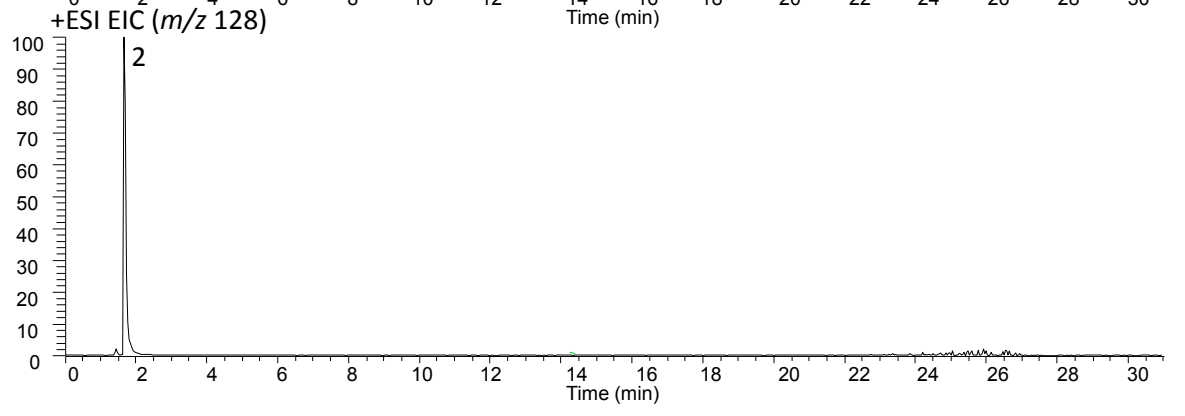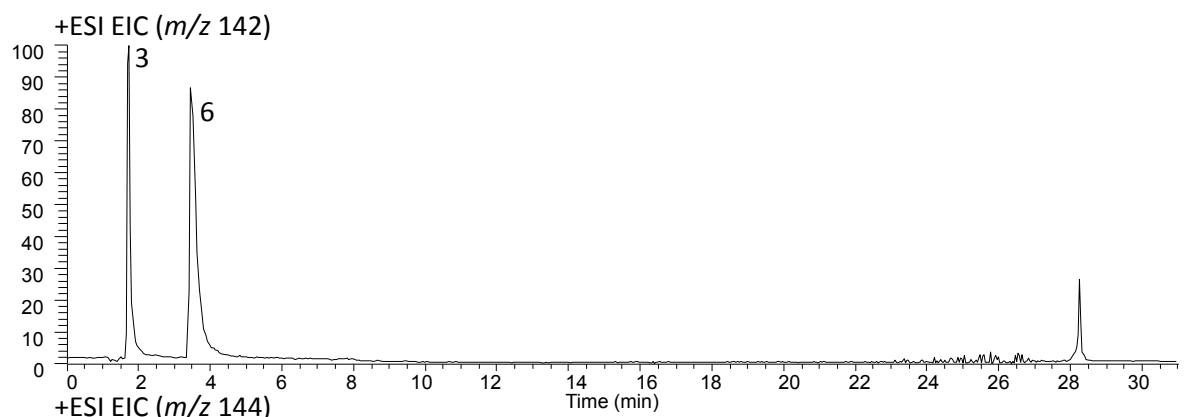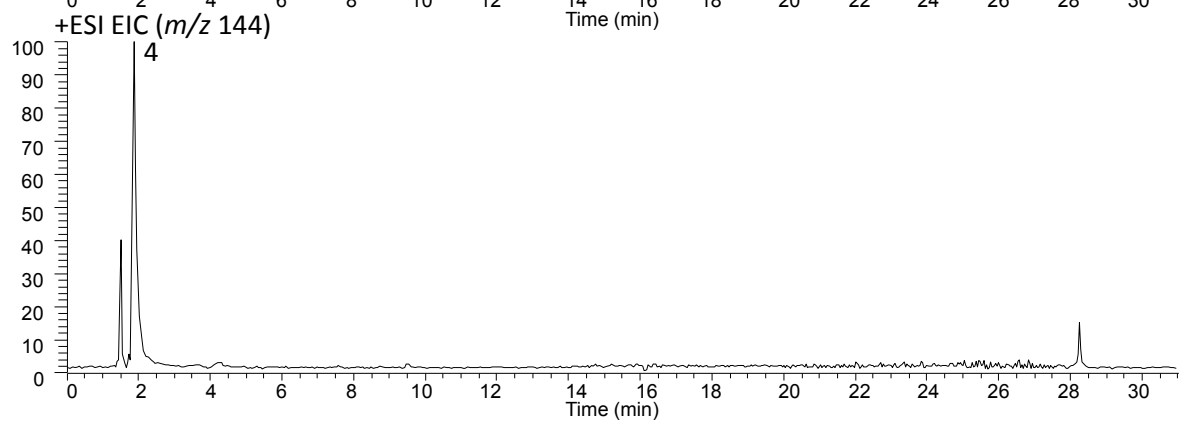

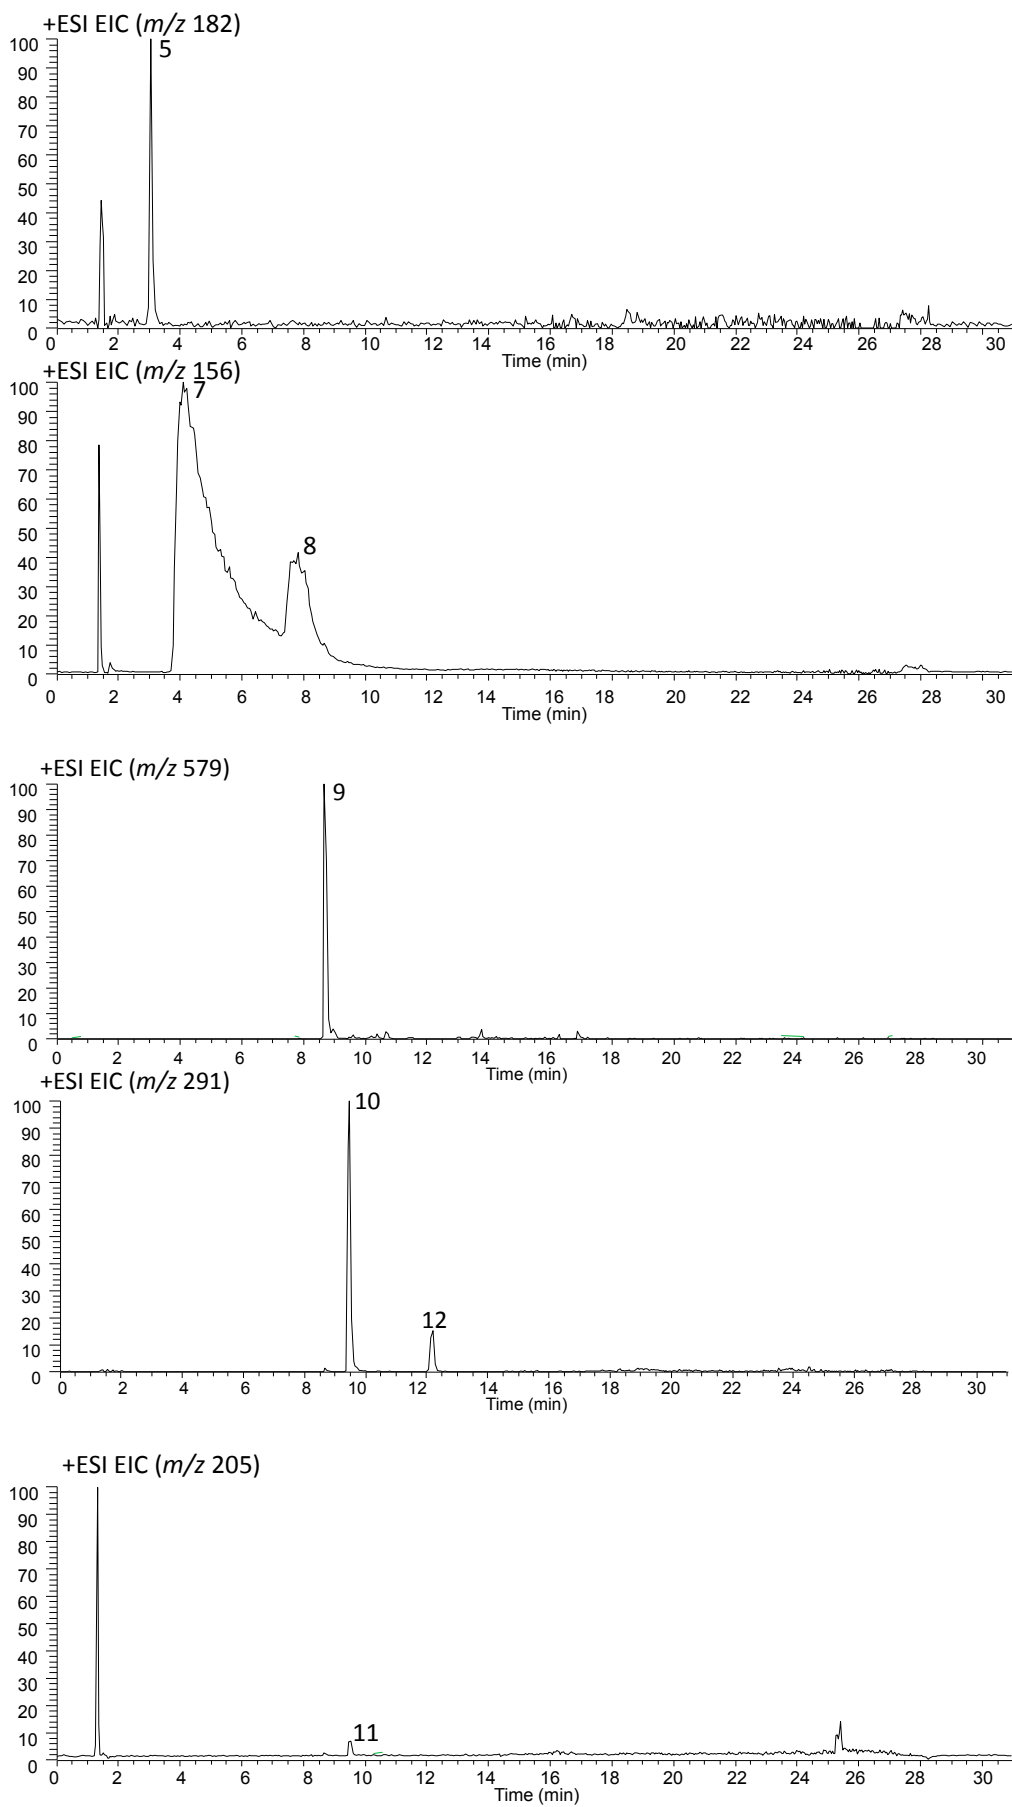

**Figure S1.** Extracted ion chromatogram of each major component identified in ACNE.
